# Supplementary material for: Pyrene-labeled pyrrolidinyl peptide nucleic acid as a hybridization-responsive DNA probe: comparison between internal and terminal labeling
Source: Royal Society of Chemistry journal article supplement (doi:10.1039/c3ra47997h), 2014-01-01
Supplement: c3ra47997h.pdf [file c3ra47997h.pdf]

## Electronic Supplementary Information (ESI)

### **Pyrene-labeled pyrrolidiny peptide nucleic acid as a hybridization-responsive DNA probe: Comparison between internal and terminal labeling**

Chalothorn Boonlua,<sup>a</sup> Boonsong Ditmangklo,<sup>a</sup> Nisanath Reenabthue,<sup>b</sup> Chaturong Suparpprom,<sup>b</sup> Nattawee Poomsuk,<sup>c</sup> Khatcharin Siriwong<sup>c</sup> and Tirayut Vilaivan<sup>a,\*</sup>

<sup>a</sup>Organic Synthesis Research Unit, Department of Chemistry, Faculty of Science, Chulalongkorn University, Phayathai Road, Patumwan, Bangkok 10330, Thailand

<sup>b</sup>Department of Chemistry, Faculty of Science, Naresuan University, Ta-Po District, Muang, Phitsanulok 65000, Thailand

<sup>c</sup>Materials Chemistry Research Unit, Department of Chemistry, Faculty of Science, Khon Kaen University, Khon Kaen 40002, Thailand

\*E-mail: vtirayut@chula.ac.th

## Content

|                 | <b>Page</b>                                                                                               |    |
|-----------------|-----------------------------------------------------------------------------------------------------------|----|
| <b>Fig. S1</b>  | Analytical HPLC chromatogram and MALDI-TOF mass spectrum of terminally PyBtr-labeled <b>T9</b>            | 3  |
| <b>Fig. S2</b>  | Analytical HPLC chromatogram and MALDI-TOF mass spectrum of terminally PyBtr-labeled <b>M10</b>           | 4  |
| <b>Fig. S3</b>  | Analytical HPLC chromatogram and MALDI-TOF mass spectrum of terminally PyBtr-labeled <b>M11</b>           | 5  |
| <b>Fig. S4</b>  | Analytical HPLC chromatogram and MALDI-TOF mass spectrum of terminally PyBtr-labeled <b>M12</b>           | 6  |
| <b>Fig. S5</b>  | Analytical HPLC chromatogram and MALDI-TOF mass spectrum of internally PyBtr-labeled <b>TT</b>            | 7  |
| <b>Fig. S6</b>  | Analytical HPLC chromatogram and MALDI-TOF mass spectrum of internally PyBtr-labeled <b>AA</b>            | 8  |
| <b>Fig. S7</b>  | Analytical HPLC chromatogram and MALDI-TOF mass spectrum of internally PyBtr-labeled <b>CC</b>            | 9  |
| <b>Fig. S8</b>  | Analytical HPLC chromatogram and MALDI-TOF mass spectrum of internally PyBtr-labeled <b>GG</b>            | 10 |
| <b>Fig. S9</b>  | Analytical HPLC chromatogram and MALDI-TOF mass spectrum of internally PyBtr-labeled <b>T9_TT</b>         | 11 |
| <b>Fig. S10</b> | Analytical HPLC chromatogram and MALDI-TOF mass spectrum of internally PyBtr-labeled <b>M10_AT</b>        | 12 |
| <b>Fig. S11</b> | Analytical HPLC chromatogram and MALDI-TOF mass spectrum of internally PyBtr-labeled <b>M11_TT</b>        | 13 |
| <b>Fig. S12</b> | Analytical HPLC chromatogram and MALDI-TOF mass spectrum of internally PyBtr-labeled <b>M11_TC</b>        | 14 |
| <b>Fig. S13</b> | Analytical HPLC chromatogram and MALDI-TOF mass spectrum of internally PyBtl-labeled <b>M11_AAAA</b>      | 15 |
| <b>Fig. S14</b> | Analytical HPLC chromatogram and MALDI-TOF mass spectrum of internally PyBtl-labeled <b>M11_ATTA</b>      | 16 |
| <b>Fig. S15</b> | Analytical HPLC chromatogram and MALDI-TOF mass spectrum of internally PyBtl-labeled <b>M11_ACCA</b>      | 17 |
| <b>Fig. S16</b> | Analytical HPLC chromatogram and MALDI-TOF mass spectrum of internally PyBtl-labeled <b>M11_AGGA</b>      | 18 |
| <b>Fig. S17</b> | Analytical HPLC chromatogram and MALDI-TOF mass spectrum of internally PyBtl-labeled <b>M11_TAAT</b>      | 19 |
| <b>Fig. S18</b> | Analytical HPLC chromatogram and MALDI-TOF mass spectrum of internally PyBtl-labeled <b>M11_TTTT</b>      | 20 |
| <b>Fig. S19</b> | Analytical HPLC chromatogram and MALDI-TOF mass spectrum of internally PyBtr-labeled <b>M12_AT(Btr)</b>   | 21 |
| <b>Fig. S20</b> | Analytical HPLC chromatogram and MALDI-TOF mass spectrum of internally PyBtl-labeled <b>M12_AT(Btl)</b>   | 22 |
| <b>Fig. S21</b> | CD spectra of unlabeled and PyBtl-labeled acpcPNA <b>M12_AT(Btl)</b>                                      | 23 |
| <b>Fig. S22</b> | Kinetics of nuclease S1 digestion of hybrids between PyBtr-labeled acpcPNA <b>M11_TT</b> with various DNA | 23 |

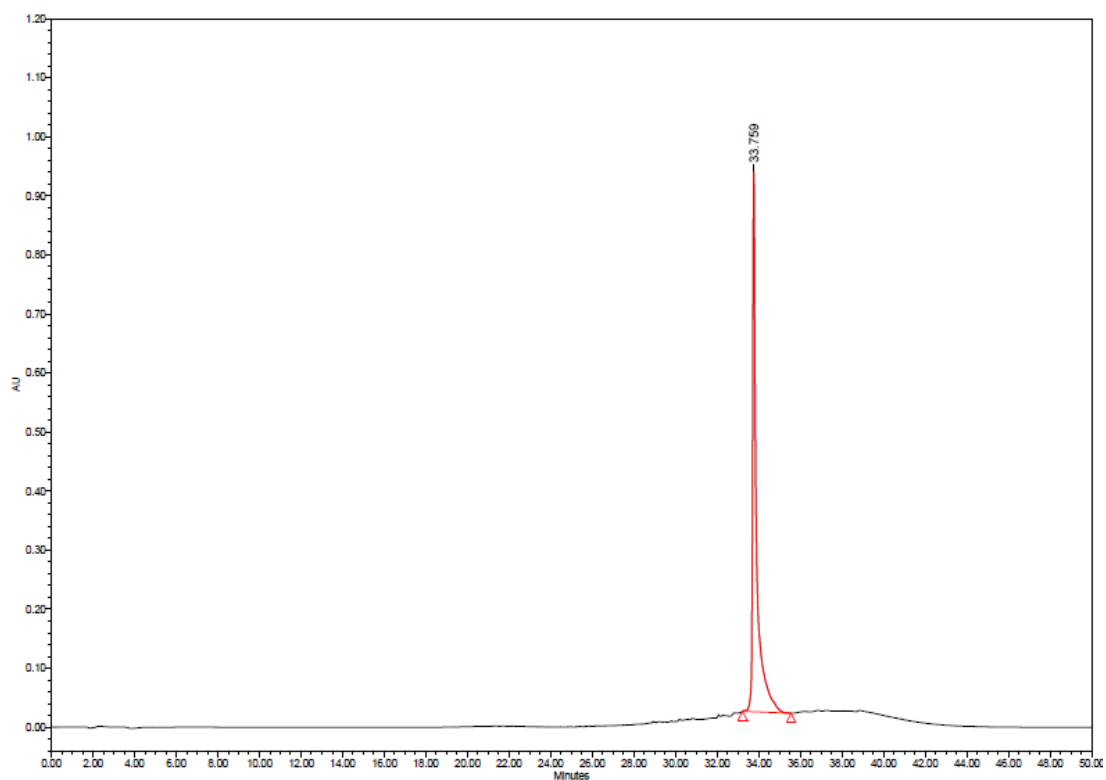

(a)

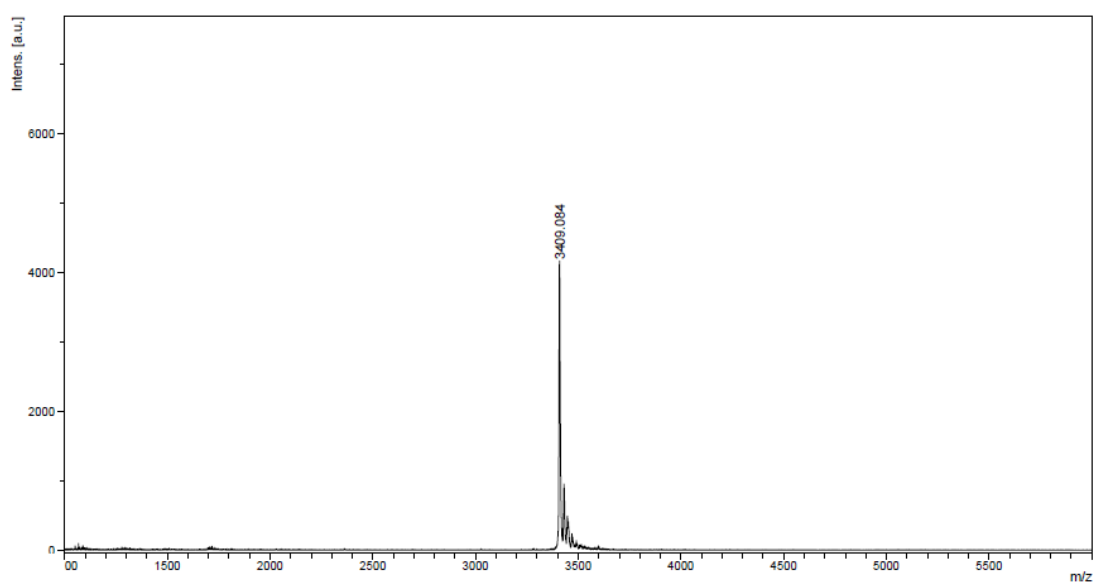

(b)

**Fig. S1.** Analytical HPLC chromatogram (a) and MALDI-TOF mass spectrum (b) of terminally PyBtr-labeled **T9** (calcd. for  $[M+H]^+$ :  $m/z = 3407.73$ ).

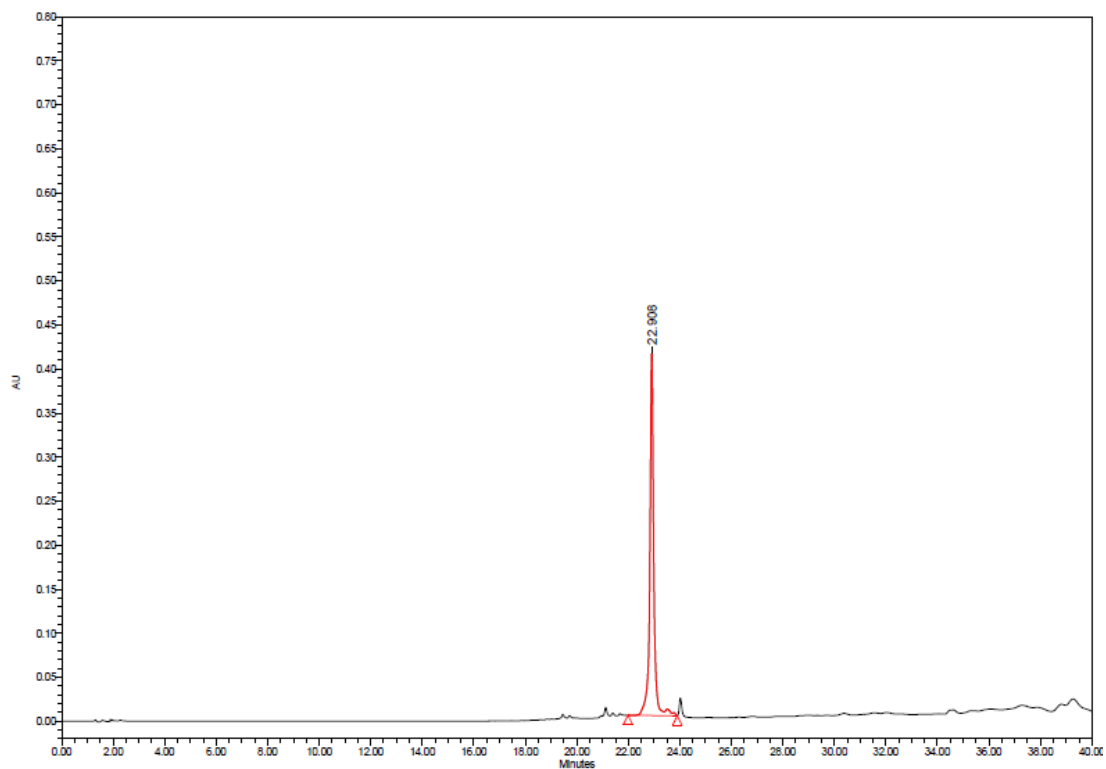

(a)

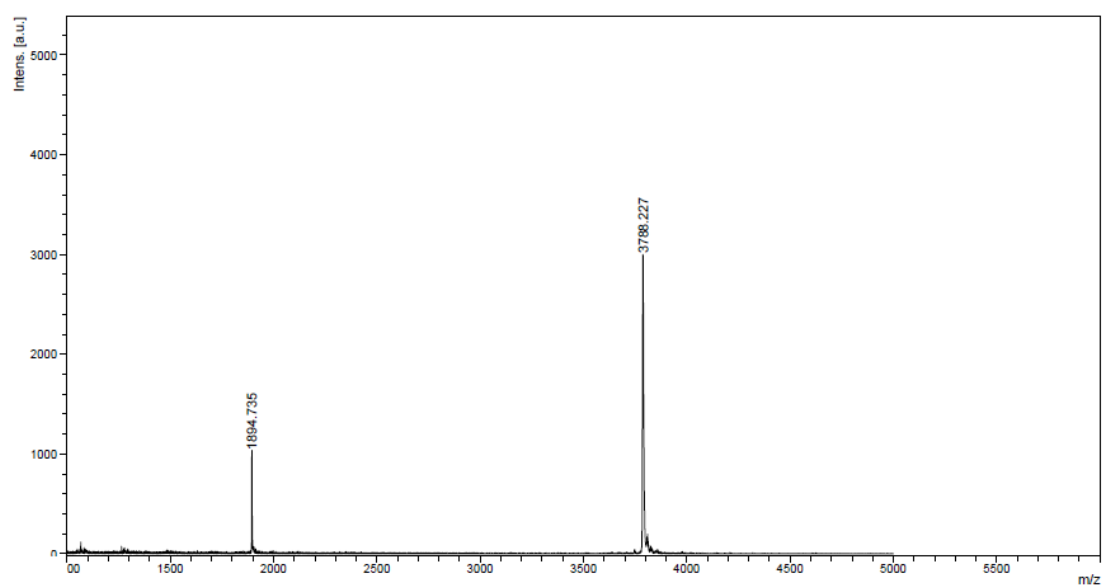

(b)

**Fig. S2.** Analytical HPLC chromatogram (a) and MALDI-TOF mass spectrum (b) of terminally PyBtr-labeled **M10** (calcd. for  $[M+H]^+$ :  $m/z = 3787.13$ ).

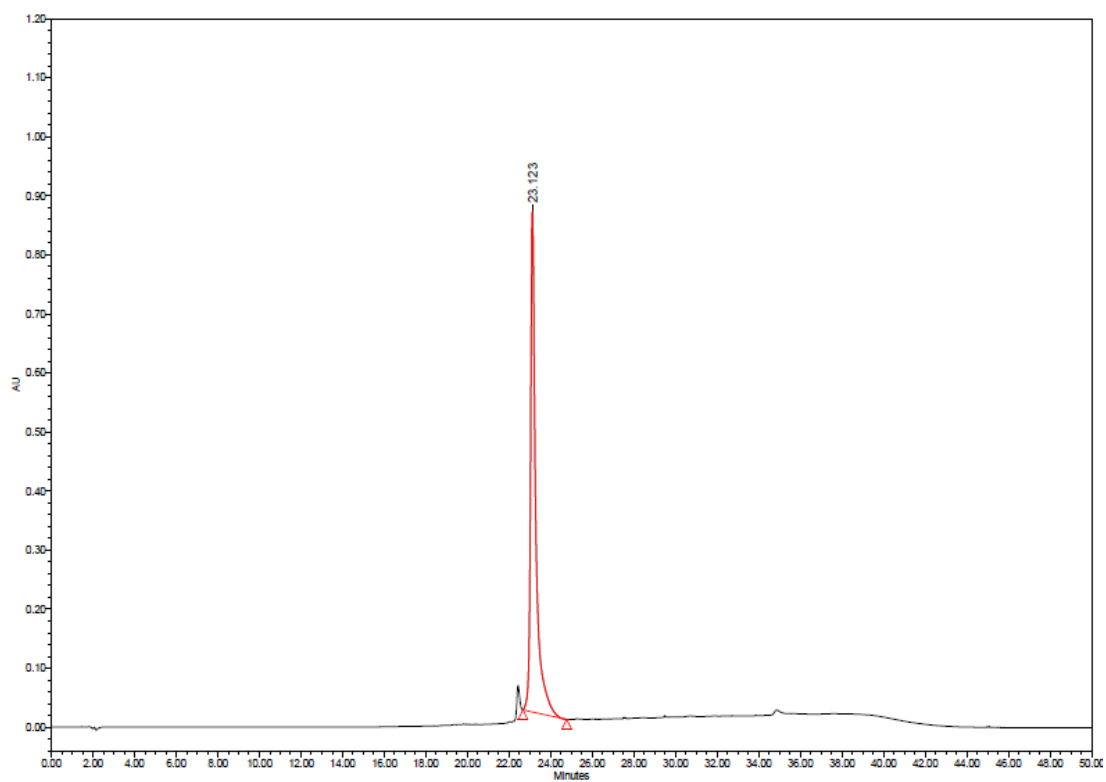

(a)

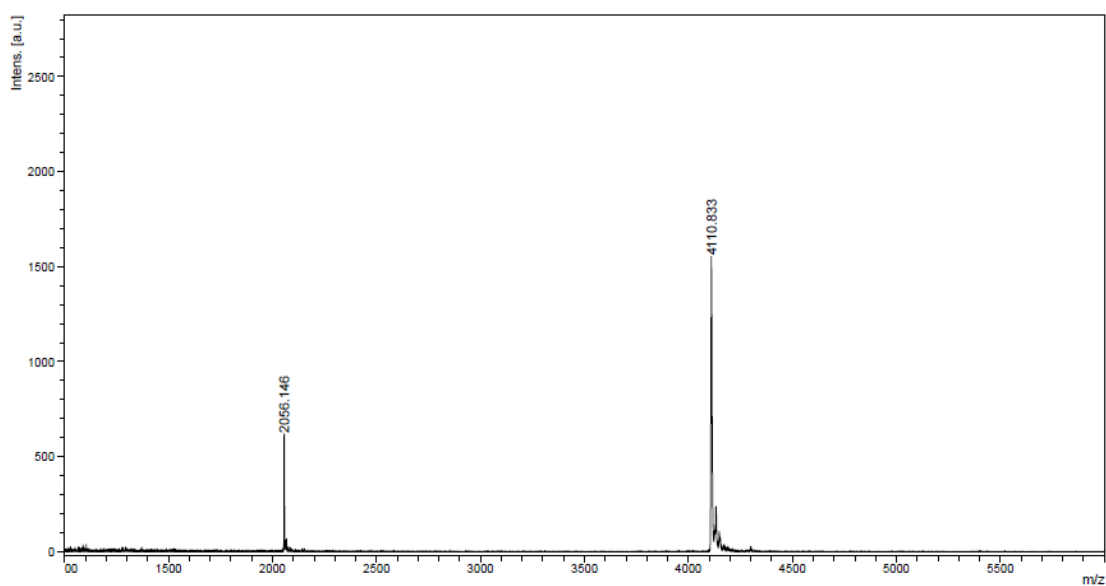

(b)

**Fig. S3.** Analytical HPLC chromatogram (a) and MALDI-TOF mass spectrum (b) of terminally PyBtr-labeled **M11** (calcd. for  $[M+H]^+$ :  $m/z = 4112.50$ ).

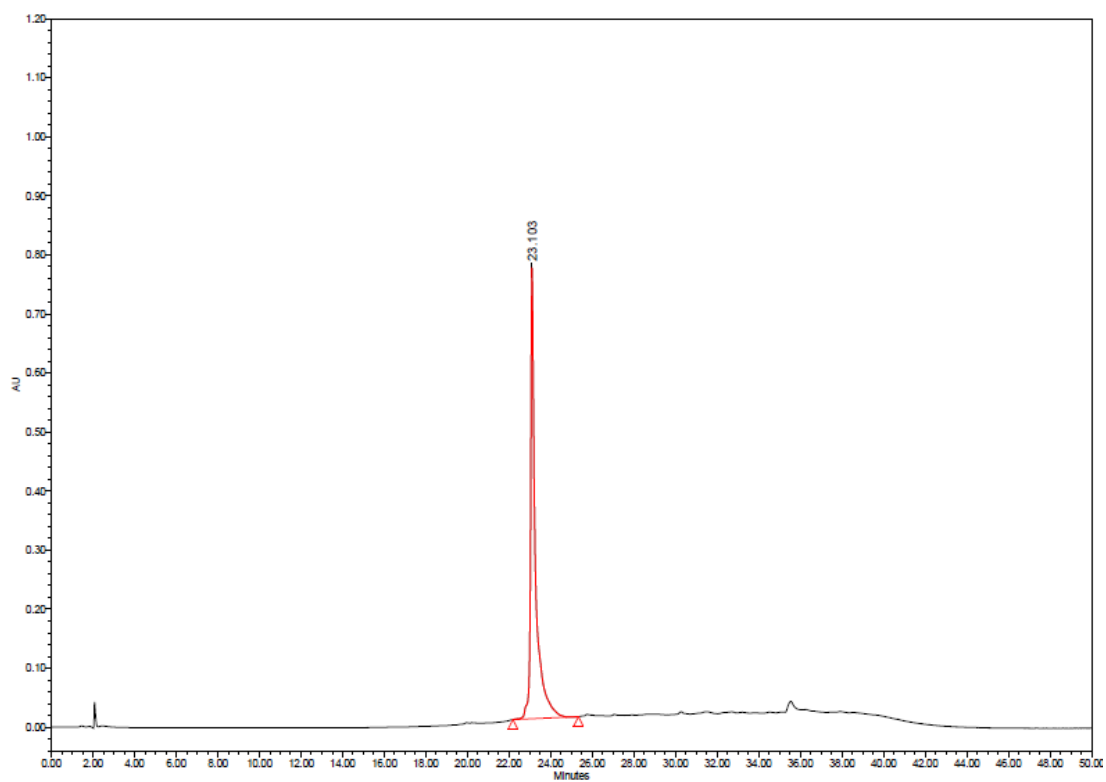

(a)

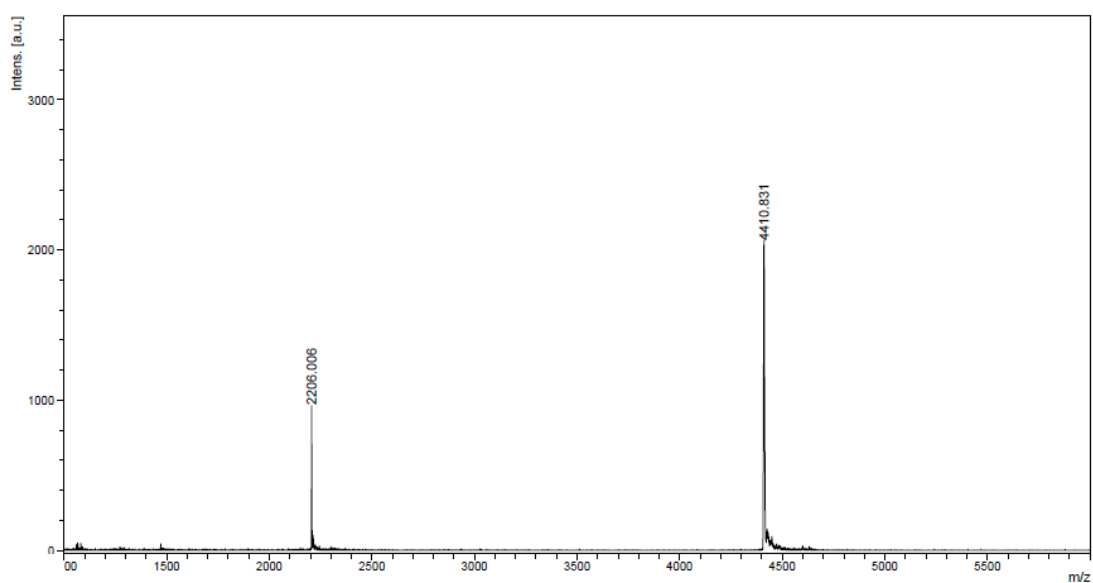

(b)

**Fig. S4.** Analytical HPLC chromatogram (a) and MALDI-TOF mass spectrum (b) of terminally PyBtr-labeled **M12** (calcd. for  $[M+H]^+$ :  $m/z = 4412.80$ ).

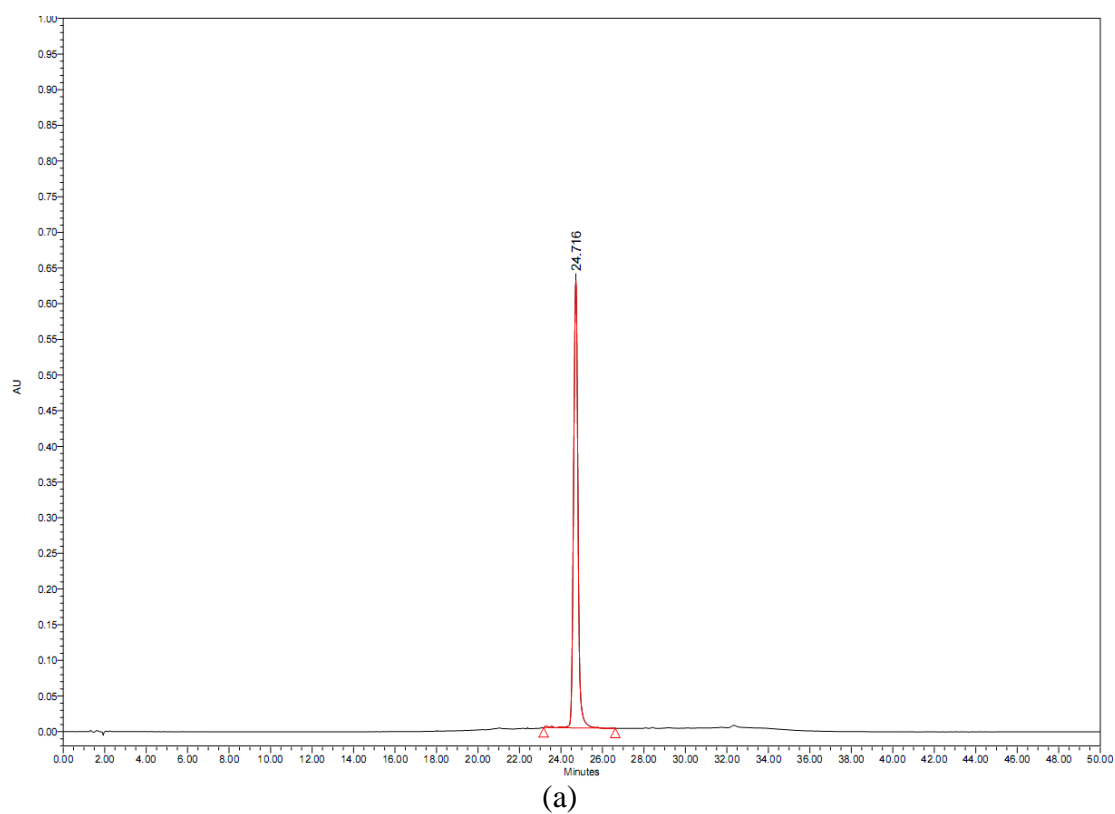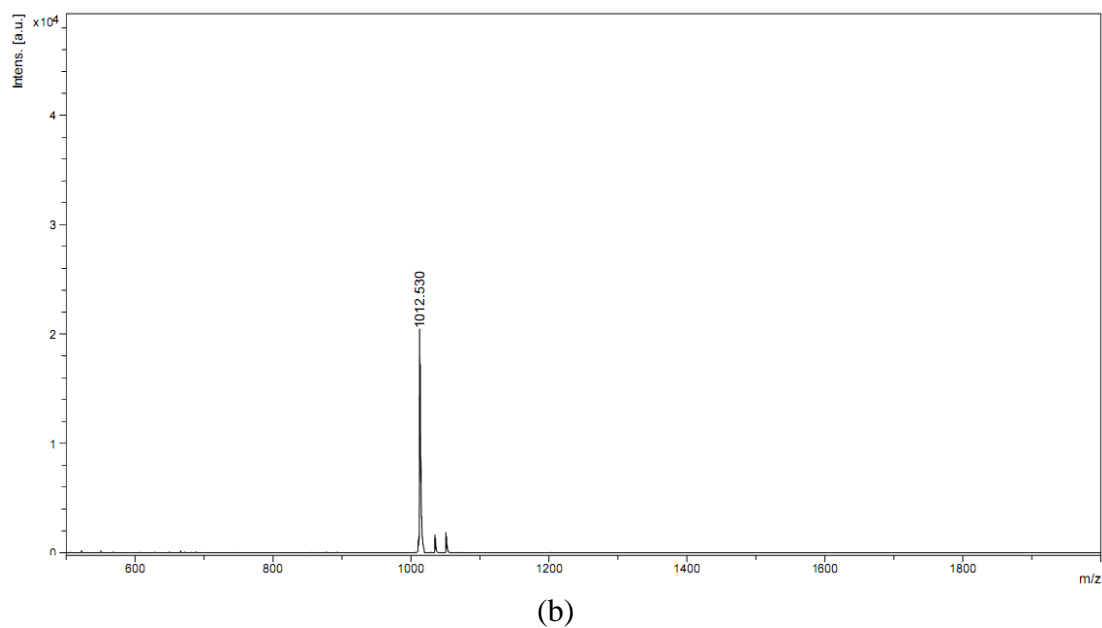

**Fig. S5.** Analytical HPLC chromatogram (a) and MALDI-TOF mass spectrum (b) of internally PyBtr-labeled **TT** (calcd. for  $[M+H]^+$ :  $m/z = 1013.20$ ).

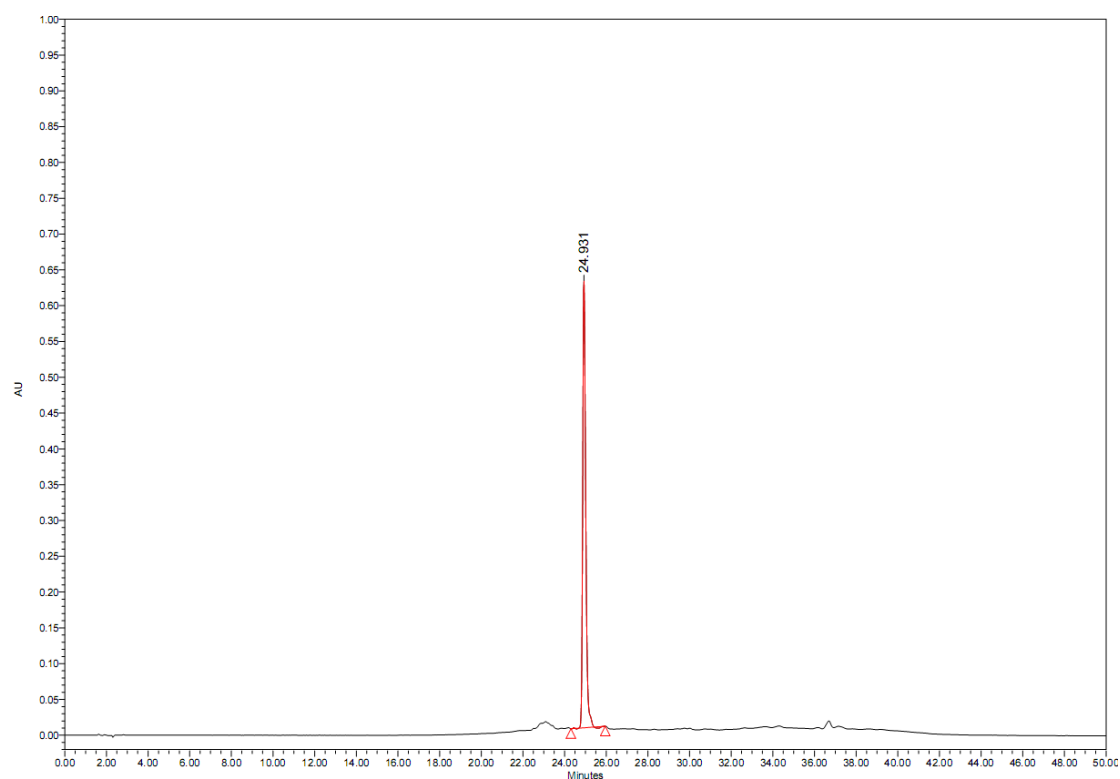

(a)

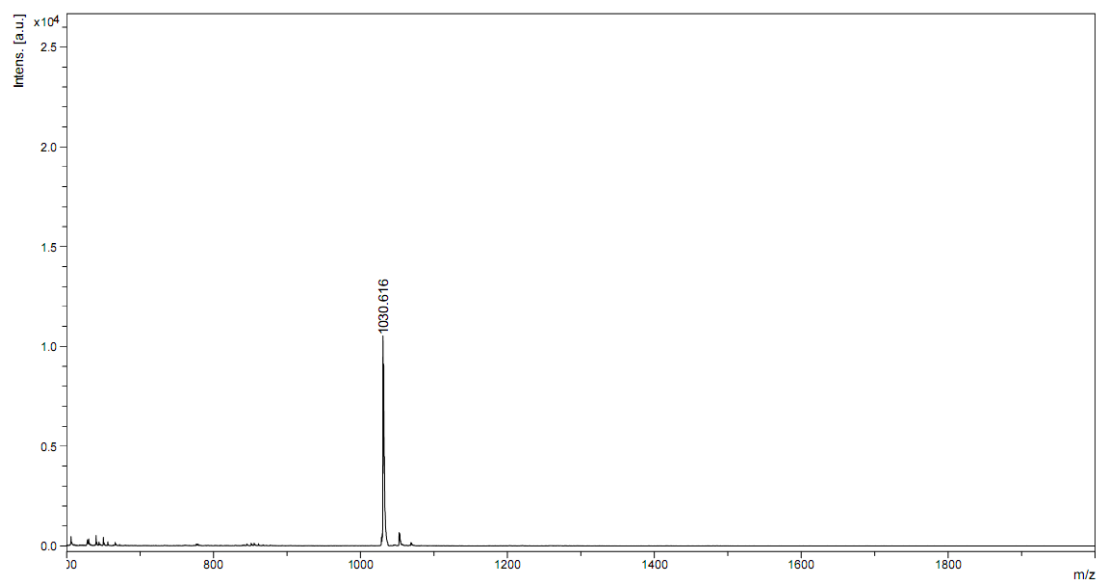

(b)

**Fig. S6.** Analytical HPLC chromatogram (a) and MALDI-TOF mass spectrum (b) of internally PyBtr-labeled **AA** (calcd. for  $[M+H]^+$ :  $m/z = 1031.23$ ).



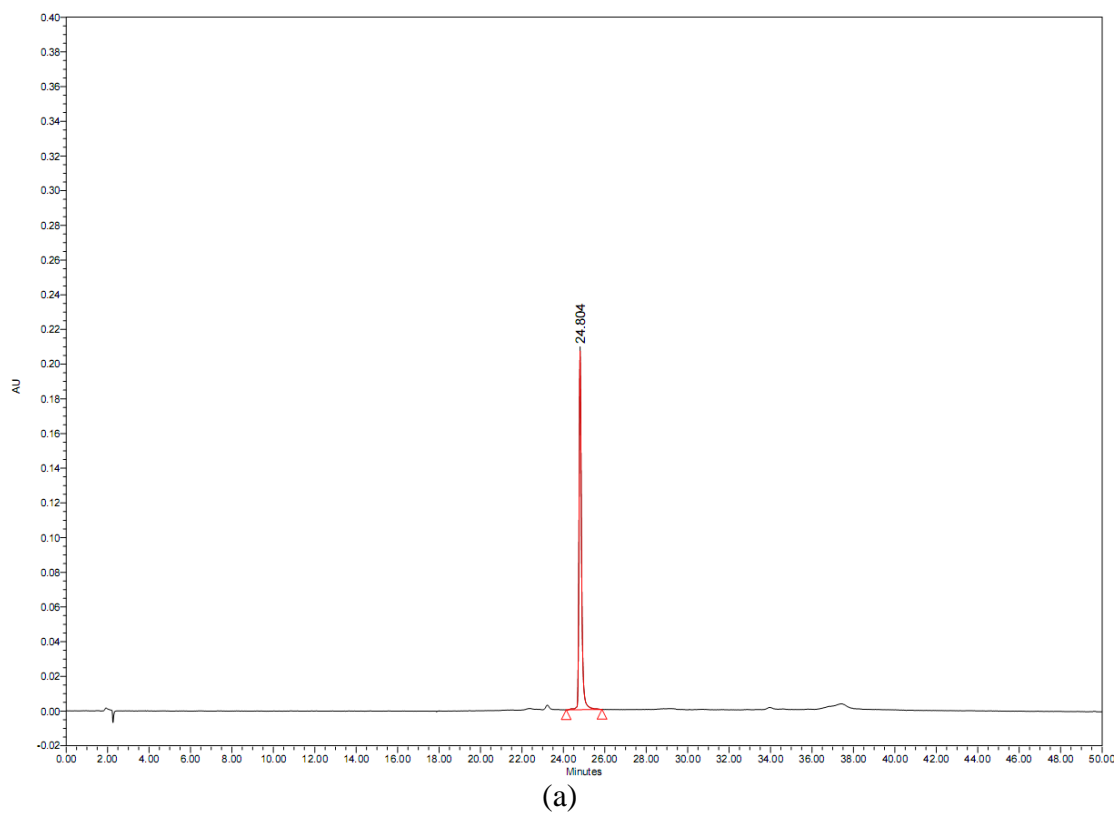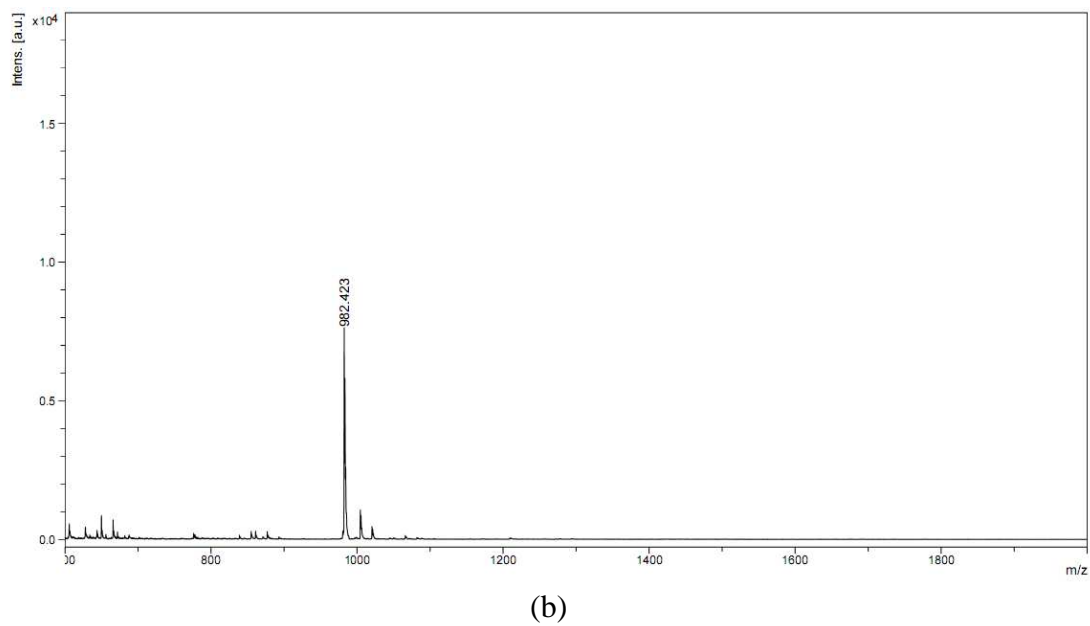

**Fig. S7.** Analytical HPLC chromatogram (a) and MALDI-TOF mass spectrum (b) of internally PyBtr-labeled CC (calcd. for  $[M+H]^+$ :  $m/z = 983.17$ ).

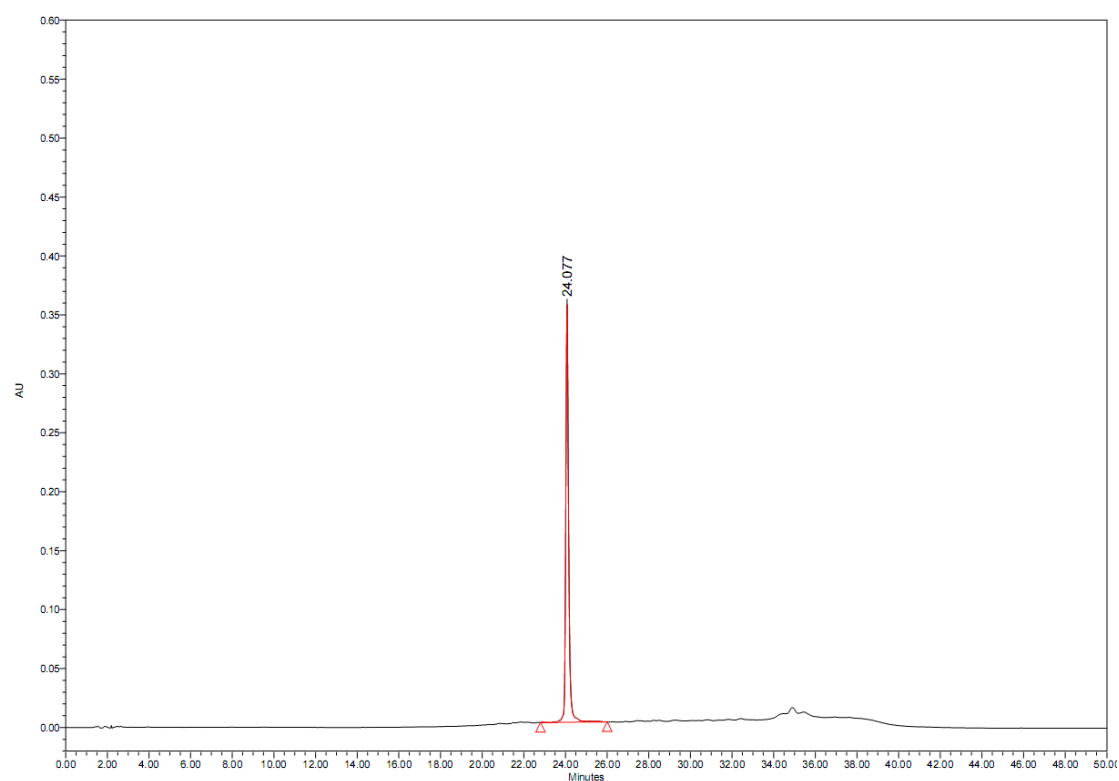

(a)

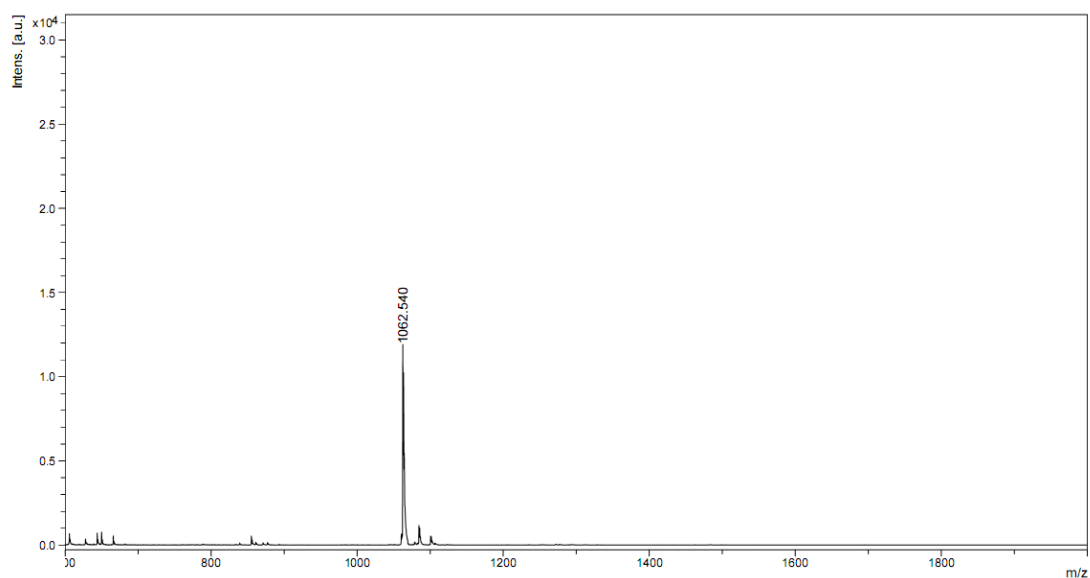

(b)

**Fig. S8.** Analytical HPLC chromatogram (a) and MALDI-TOF mass spectrum (b) of internally PyBtr-labeled **GG** (calcd. for  $[M+H]^+$ :  $m/z = 1063.22$ ).

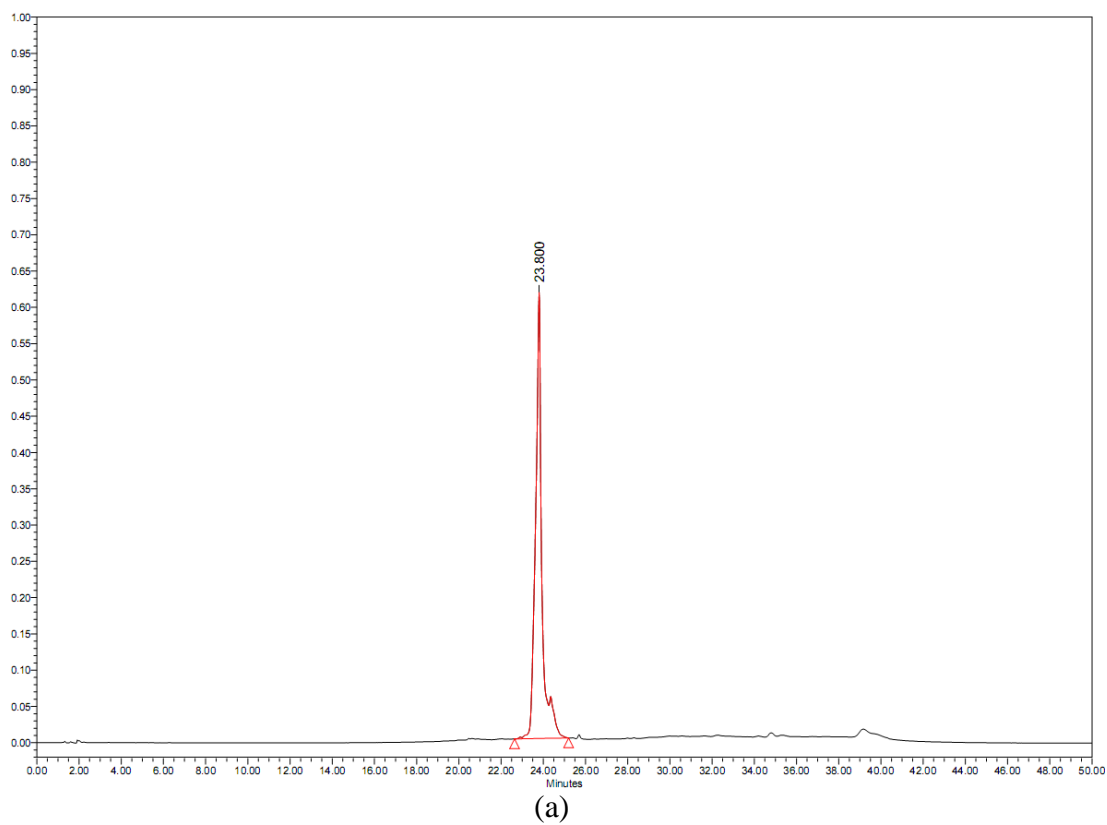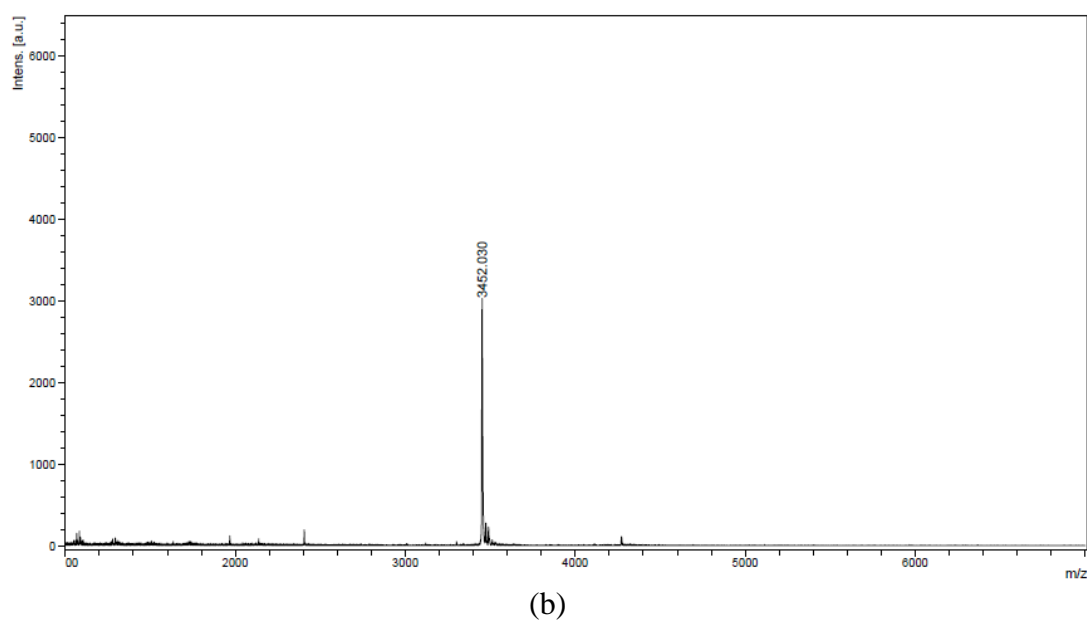

**Fig. S9.** Analytical HPLC chromatogram (a) and MALDI-TOF mass spectrum (b) of internally PyBtr-labeled **T9\_TT** (calcd. for  $[M+H]^+$ :  $m/z$  = 3450.75).

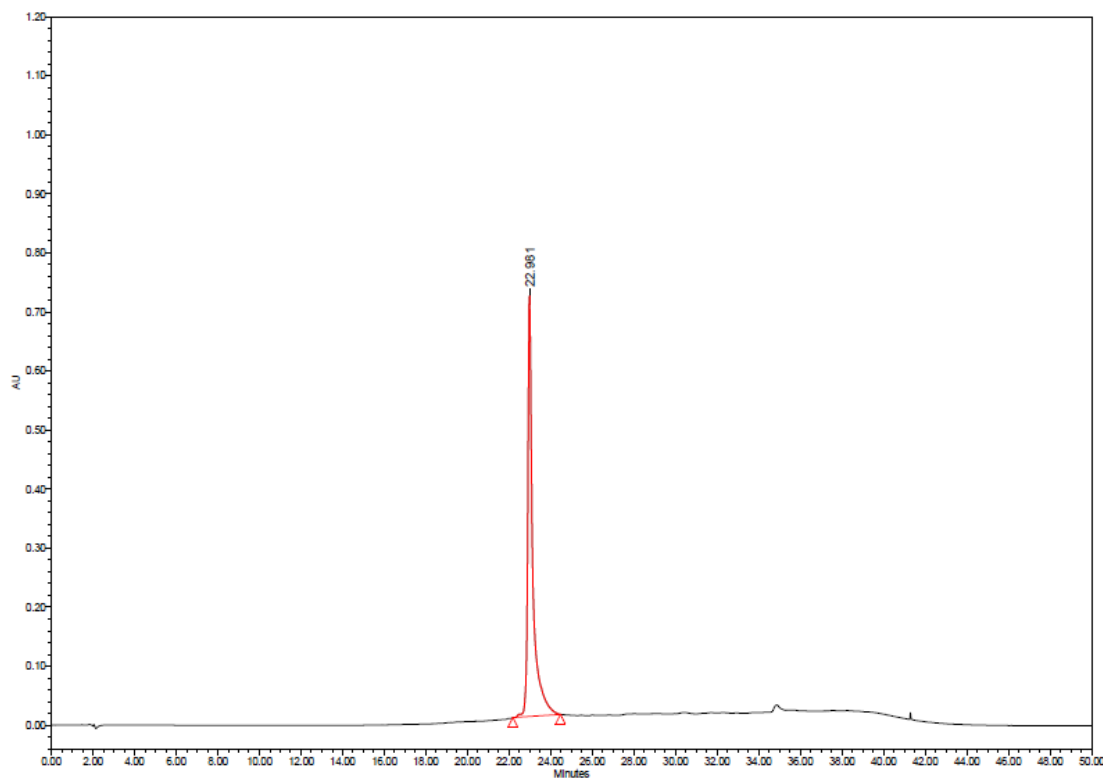

(a)

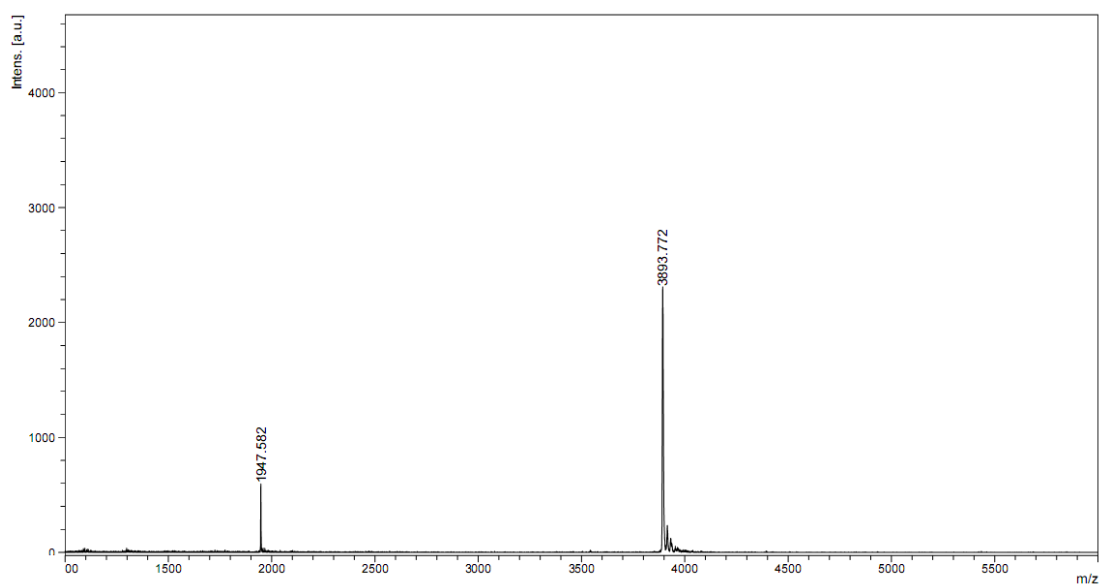

(b)

**Fig. S10.** Analytical HPLC chromatogram (a) and MALDI-TOF mass spectrum (b) of internally PyBtr-labeled **M10\_AT** (calcd. for  $[M+H]^+$ :  $m/z = 3892.21$ ).

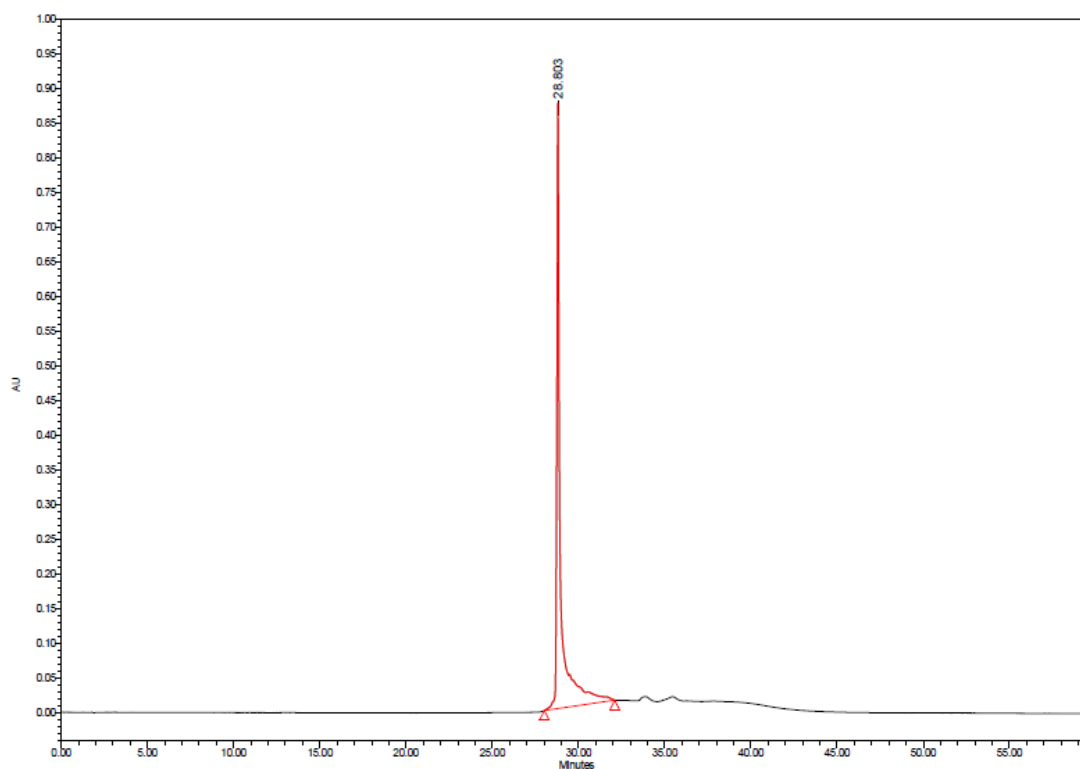

(a)

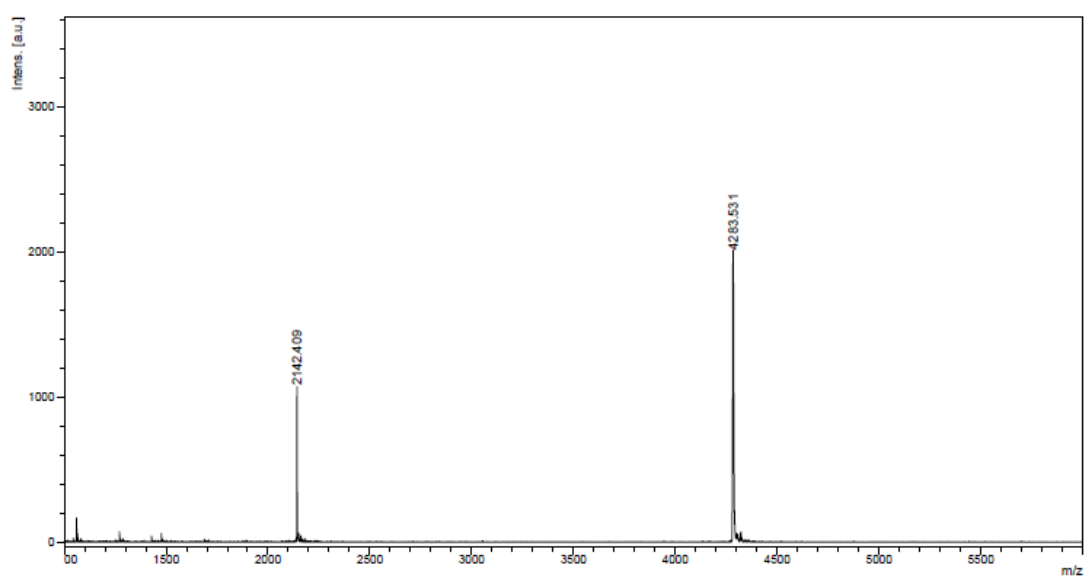

(b)

**Fig. S11.** Analytical HPLC chromatogram (a) and MALDI-TOF mass spectrum (b) of internally PyBtr-labeled **M11\_TT** (calcd. for  $[M+H]^+$ :  $m/z = 4283.69$ ).

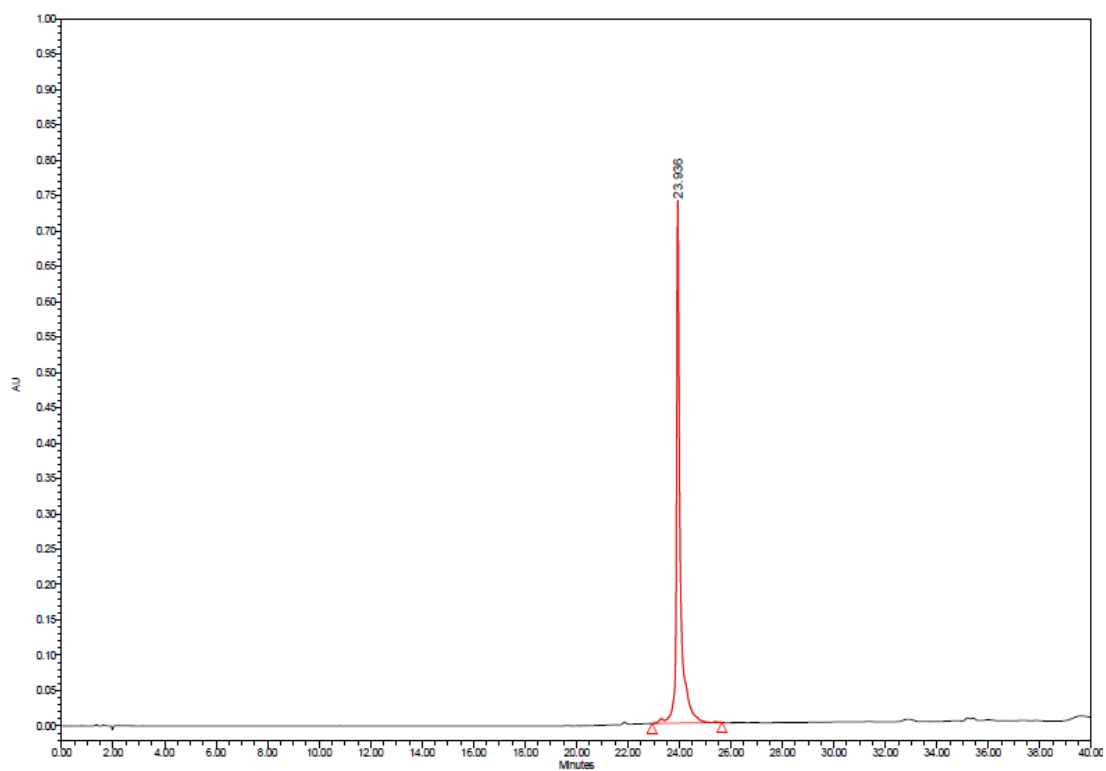

(a)

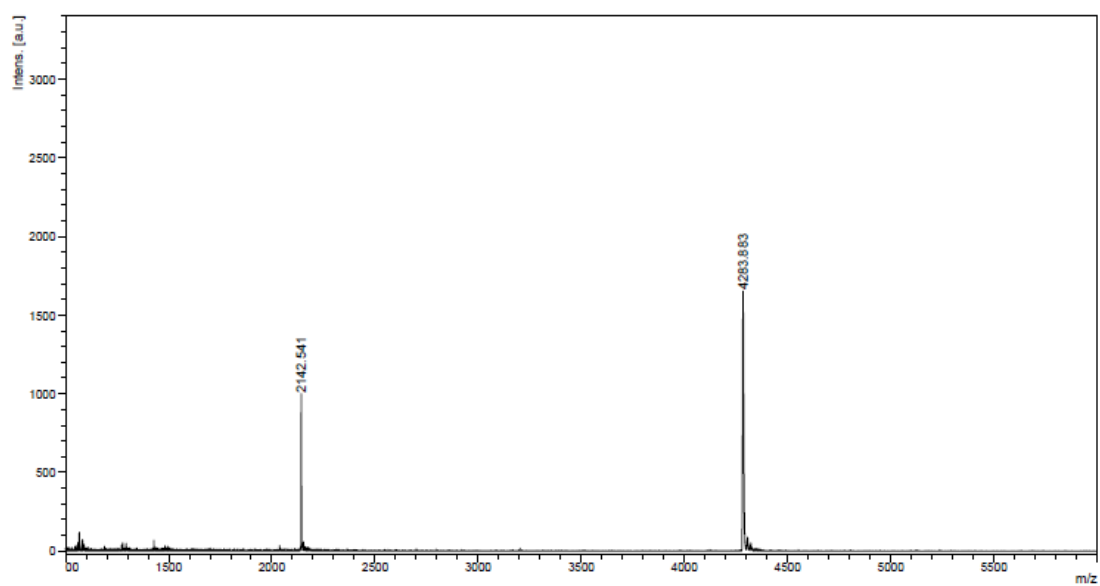

(b)

**Fig. S12.** Analytical HPLC chromatogram (a) and MALDI-TOF mass spectrum (b) of internally PyBtr-labeled **M11\_TC** (calcd. for  $[M+H]^+$ :  $m/z = 4283.69$ ).

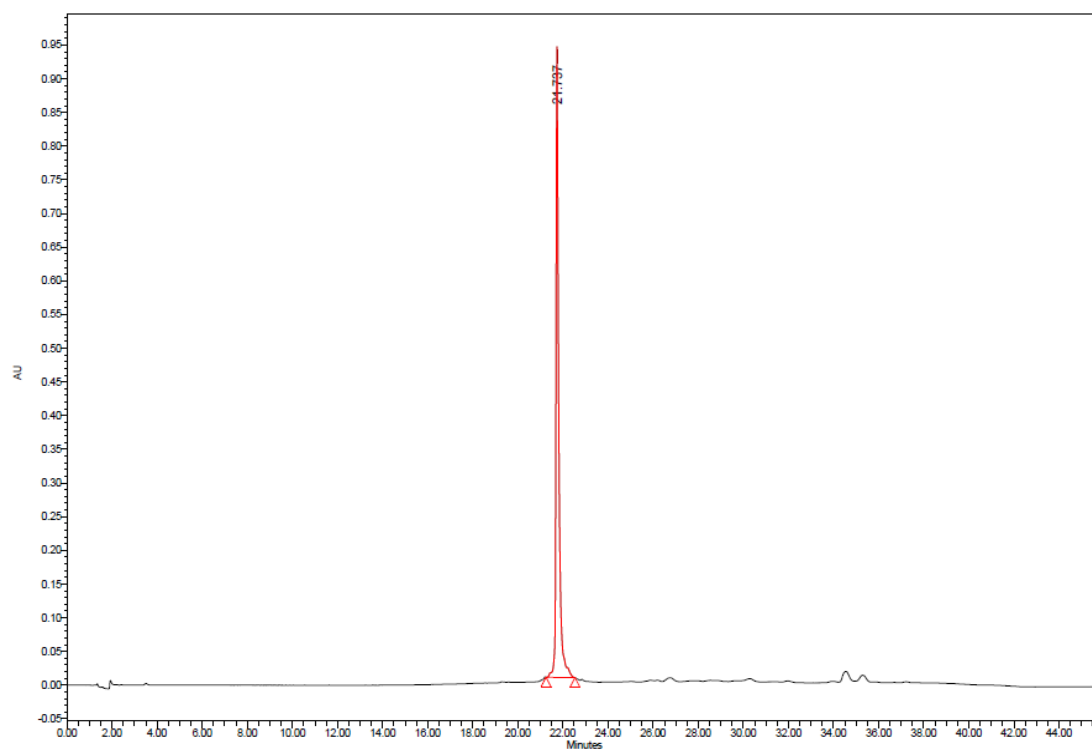

(a)

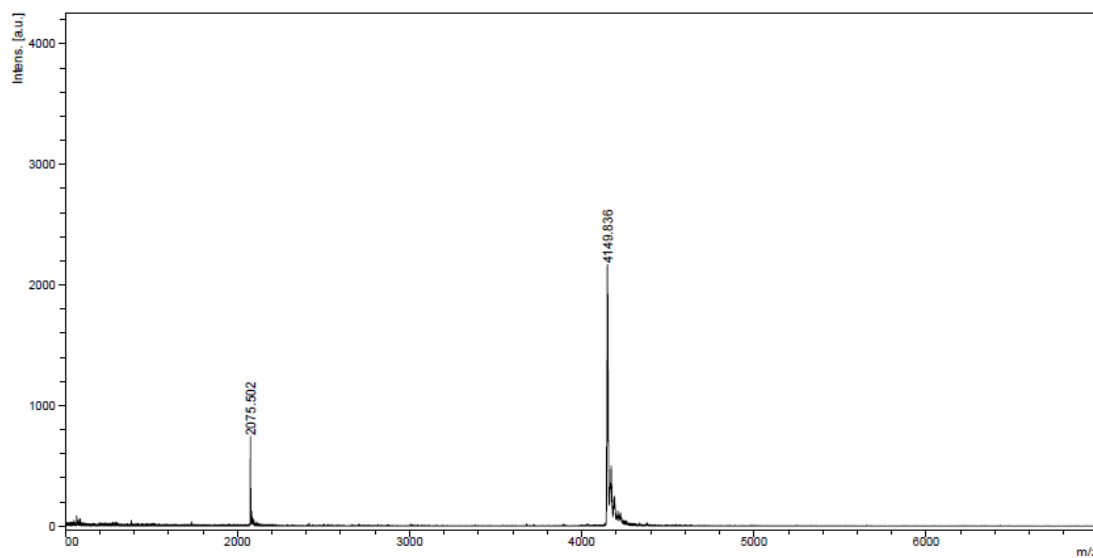

(b)

**Fig. S13.** Analytical HPLC chromatogram (a) and MALDI-TOF mass spectrum (b) of internally PyBtl-labeled **M11\_AAAA** (calcd. for  $[M+H]^+$ :  $m/z = 4150.45$ ).

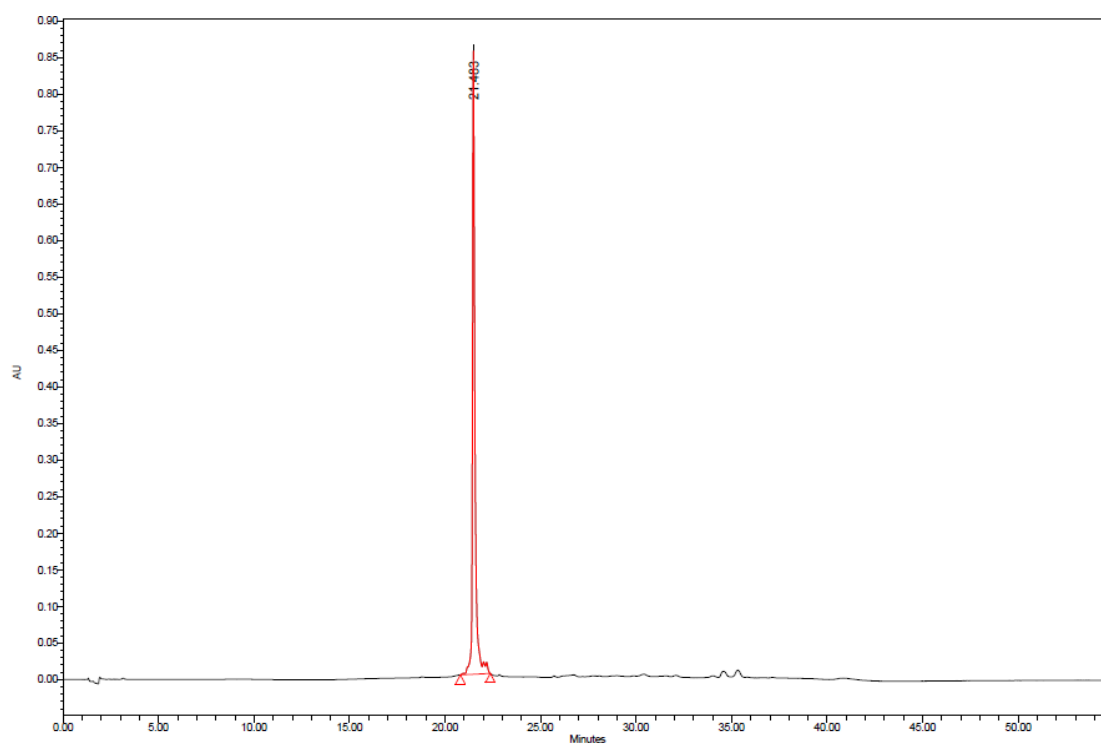

(a)

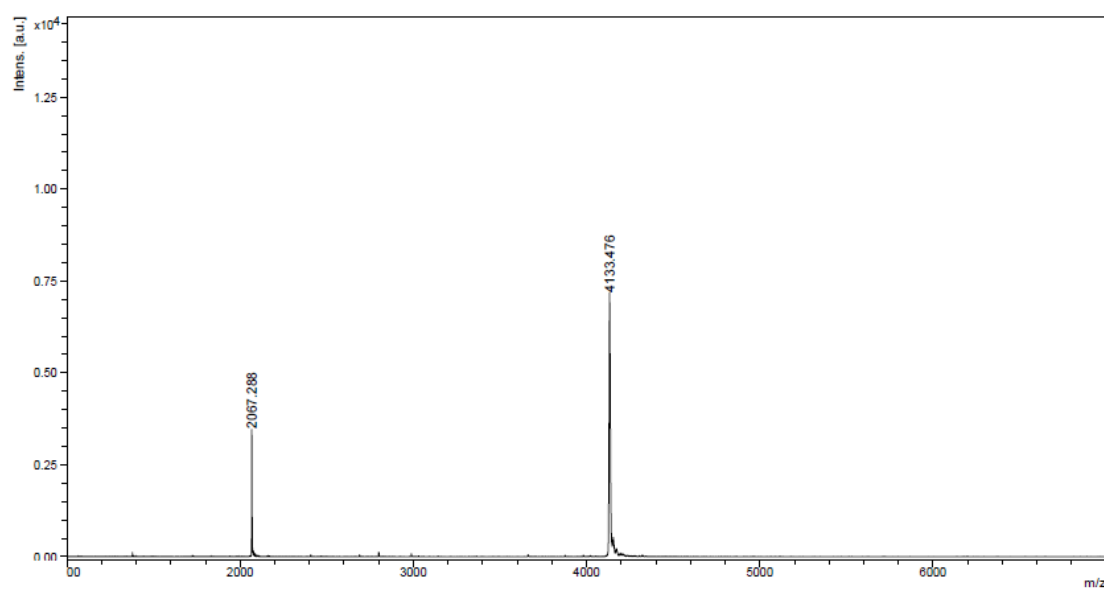

(b)

**Fig. S14.** Analytical HPLC chromatogram (a) and MALDI-TOF mass spectrum (b) of internally PyBtl-labeled **M11\_ATTA** (calcd. for  $[M+H]^+$ :  $m/z = 4132.42$ ).



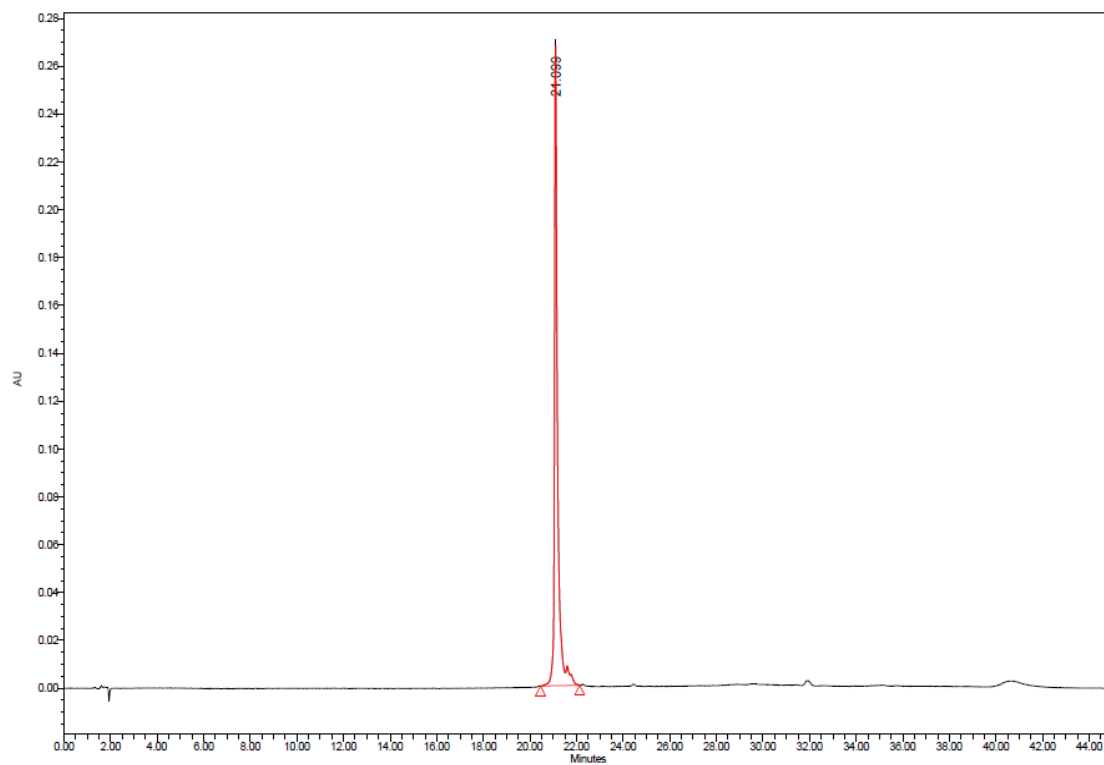

(a)

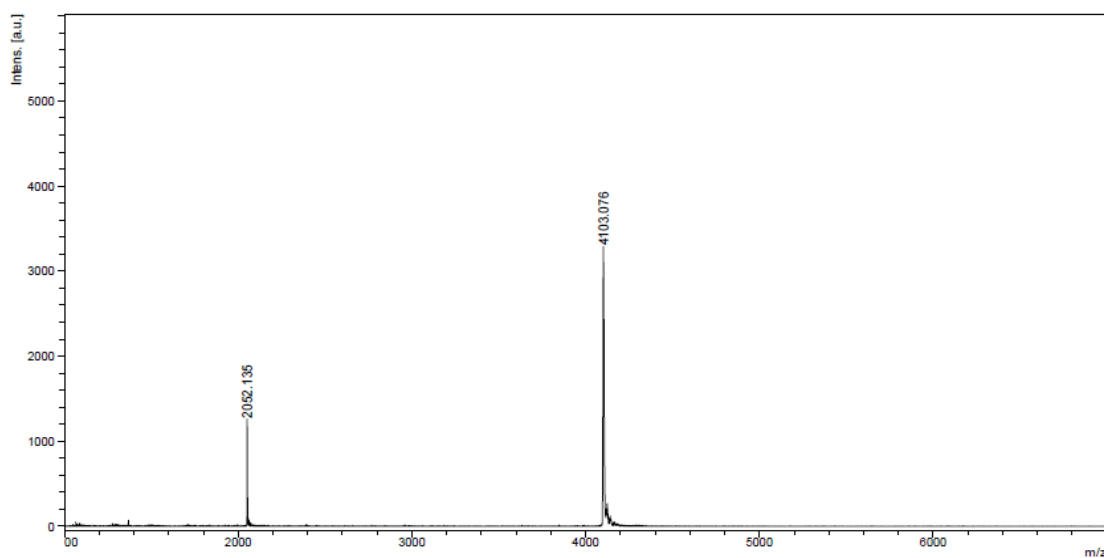

(b)

**Fig. S15.** Analytical HPLC chromatogram (a) and MALDI-TOF mass spectrum (b) of internally PyBtl-labeled **M11\_ACCA** (calcd. for  $[M+H]^+$ :  $m/z = 4102.40$ ).

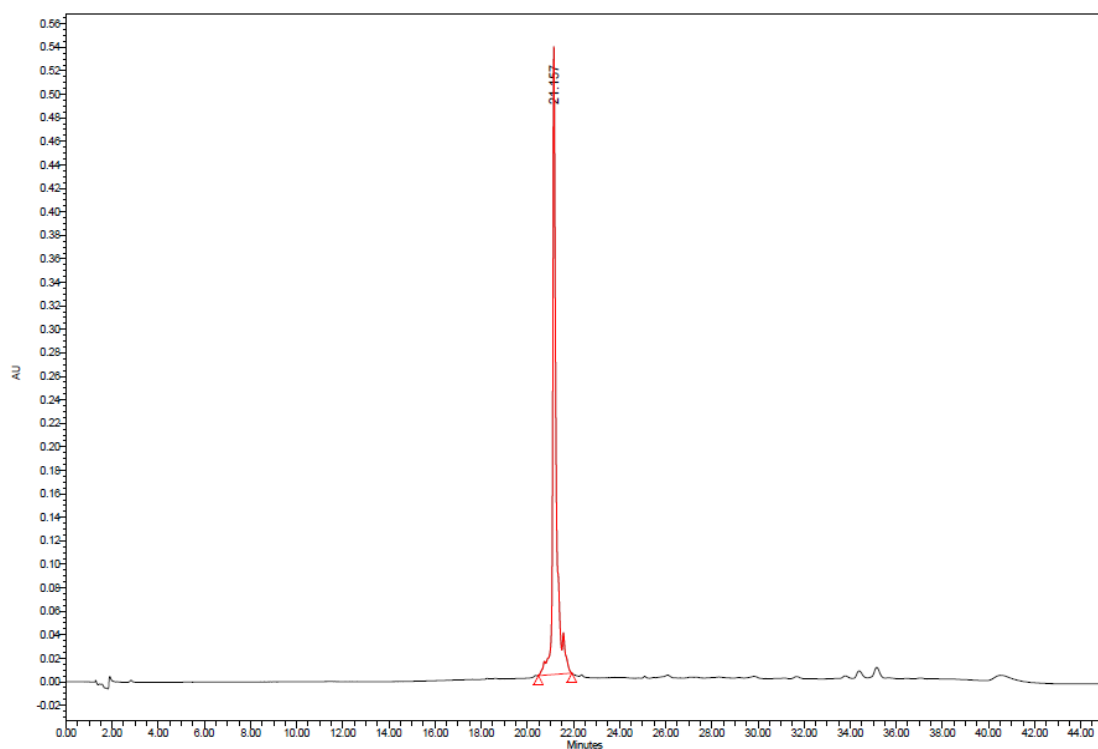

(a)

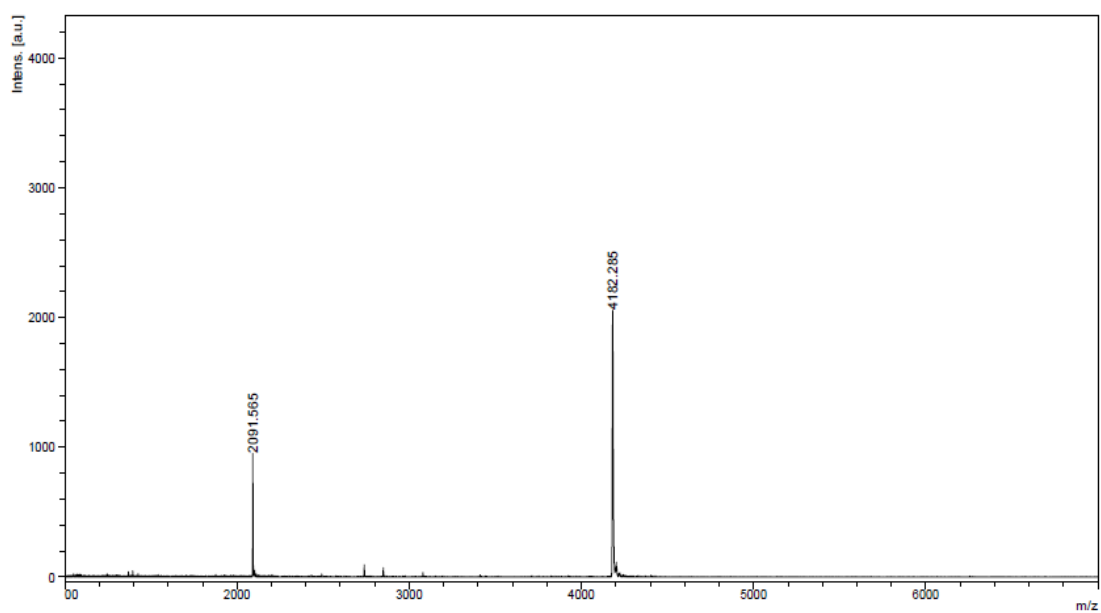

(b)

**Fig. S16.** Analytical HPLC chromatogram (a) and MALDI-TOF mass spectrum (b) of internally PyBtl-labeled **M11\_AGGA** (calcd. for  $[M+H]^+$ :  $m/z = 4182.45$ ).

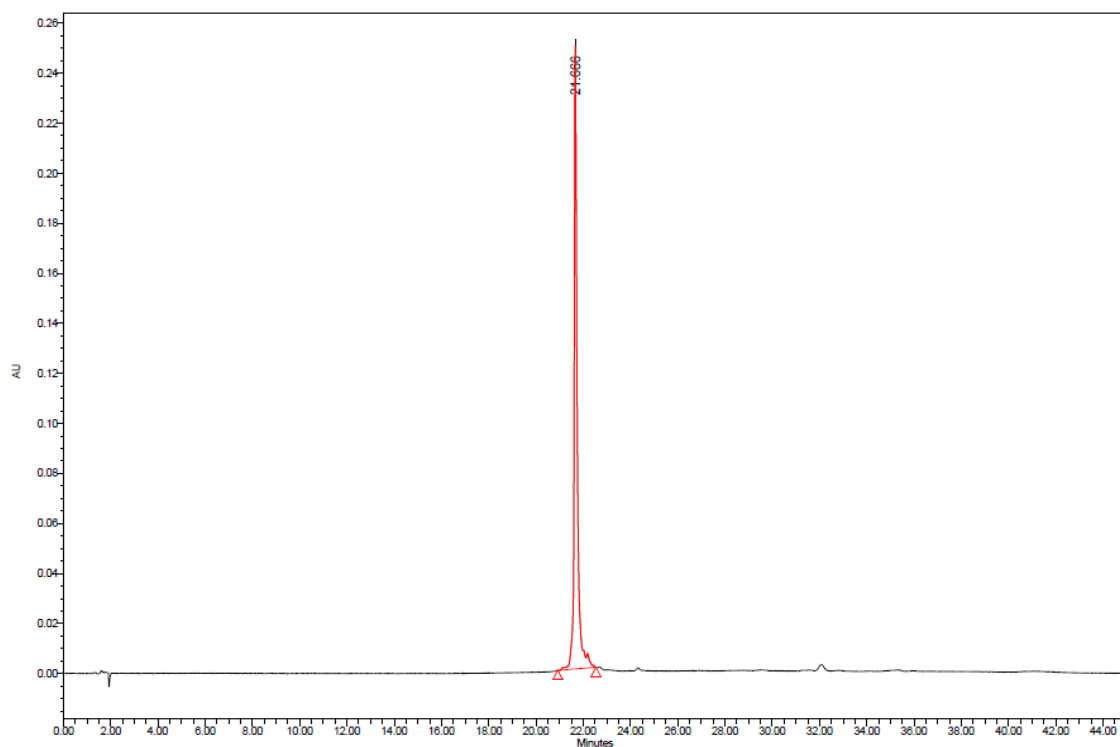

(a)

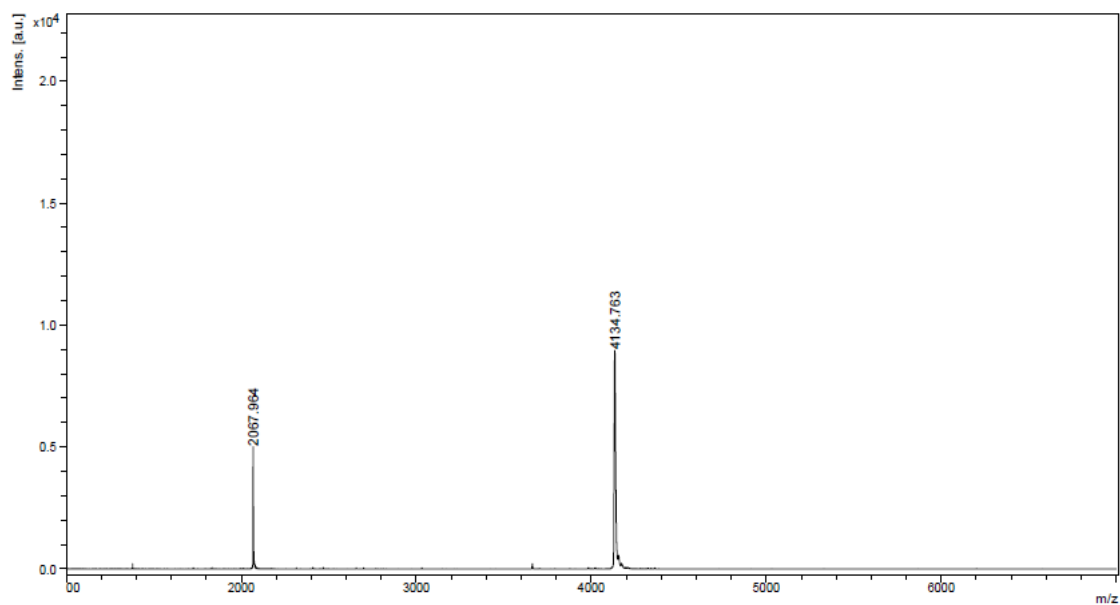

(b)

**Fig. S17.** Analytical HPLC chromatogram (a) and MALDI-TOF mass spectrum (b) of internally PyBtl-labeled **M11\_TAAT** (calcd. for  $[M+H]^+$ :  $m/z = 4132.42$ ).

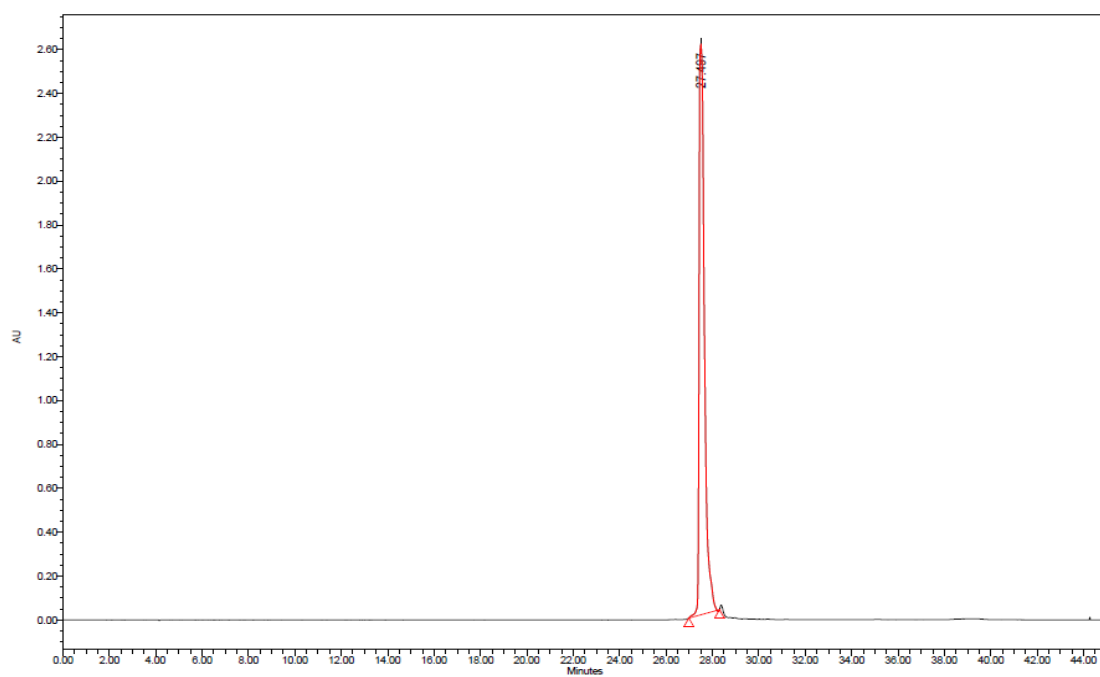

(a)

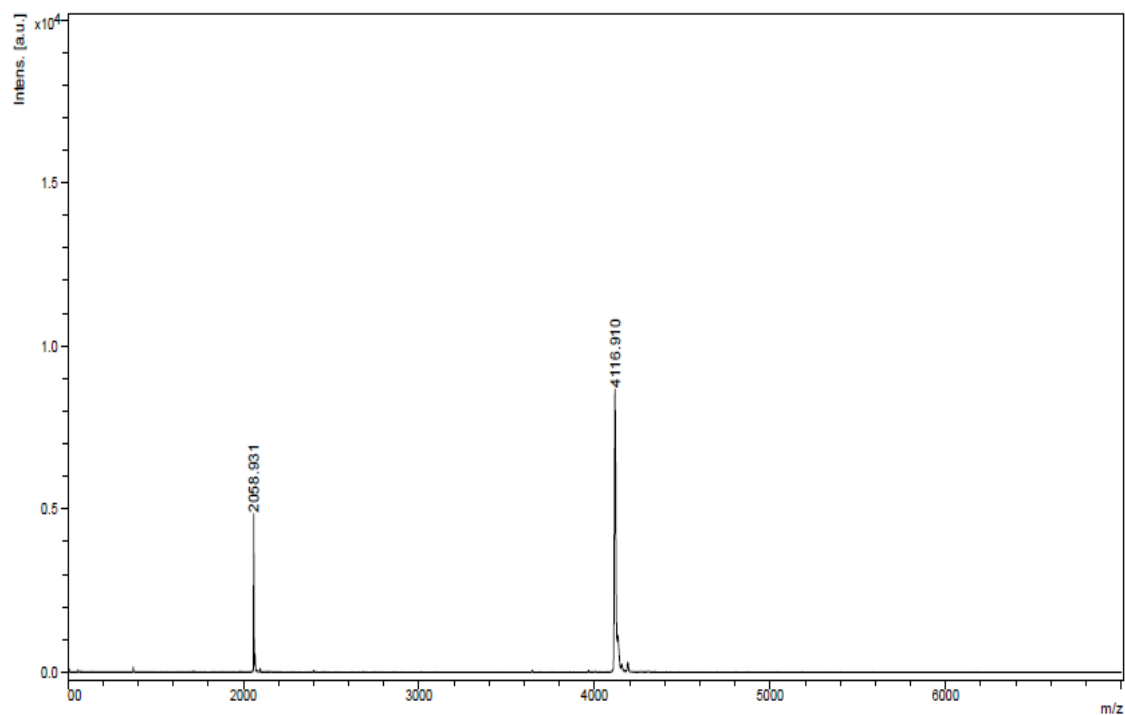

(b)

**Fig. S18.** Analytical HPLC chromatogram (a) and MALDI-TOF mass spectrum (b) of internally PyBtI-labeled **M11\_TTTT** (calcd. for  $[M+H]^+$ :  $m/z = 4114.49$ ).

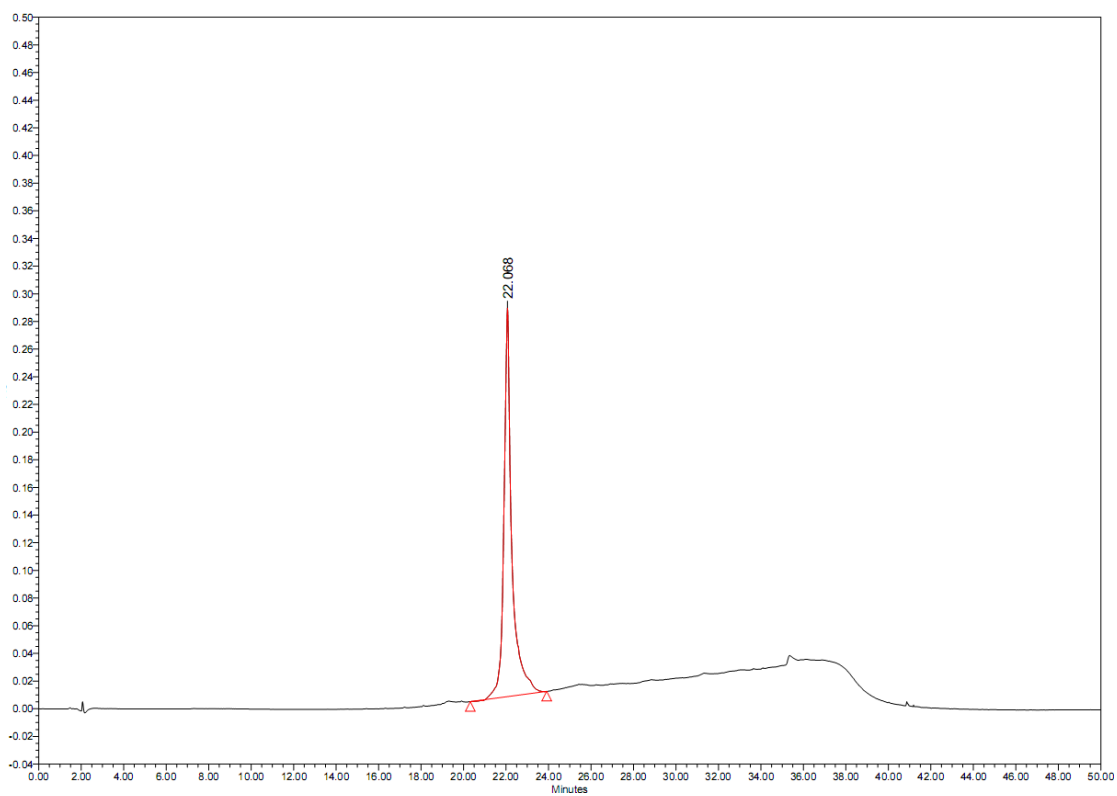

(a)

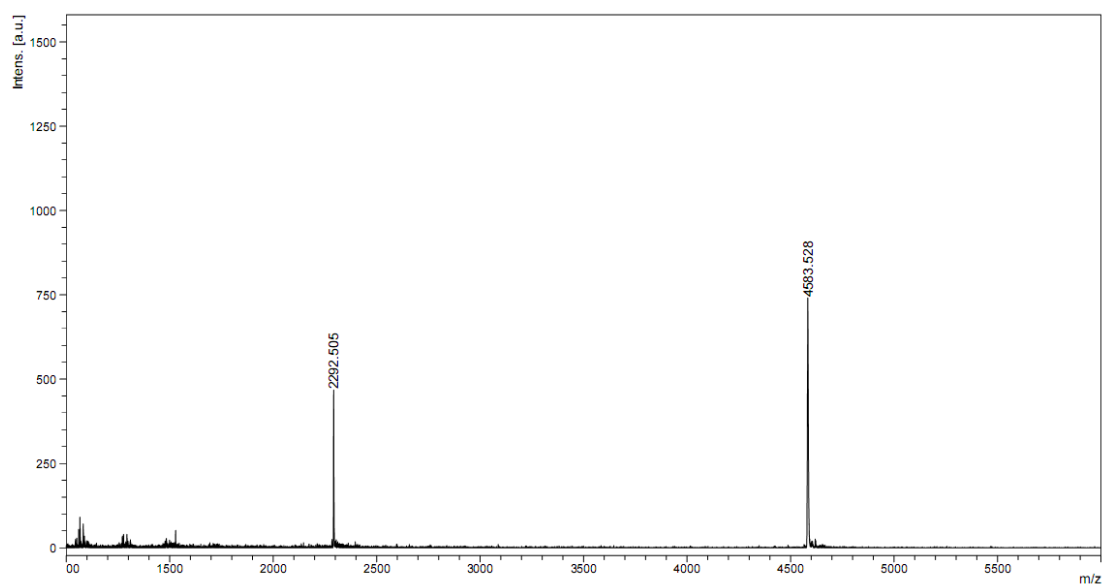

(b)

**Fig. S19.** Analytical HPLC chromatogram (a) and MALDI-TOF mass spectrum (b) of internally PyBtr-labeled **M12\_AT(Btr)** (calcd. for  $[M+H]^+$ :  $m/z = 4583.99$ ).

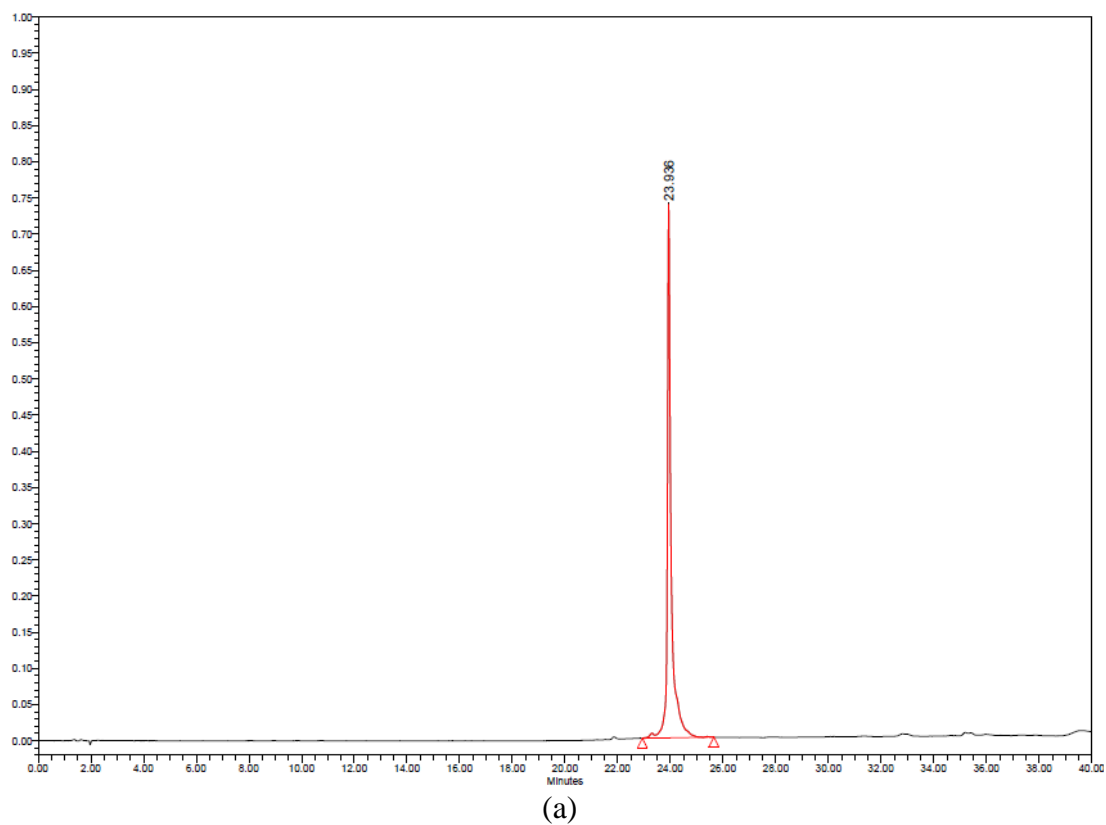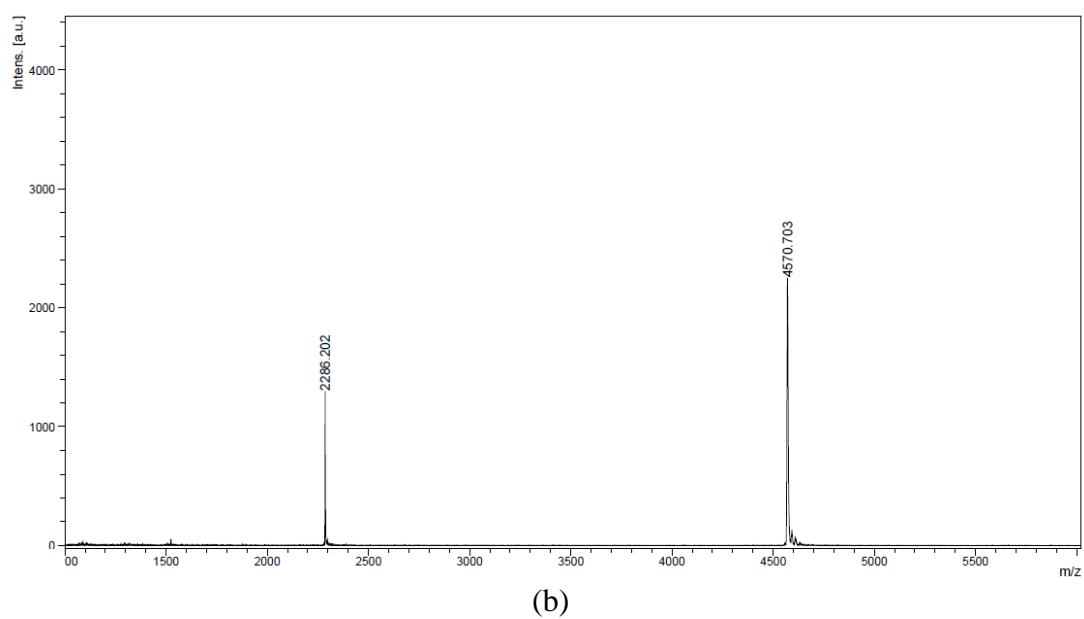

**Fig. S20.** Analytical HPLC chromatogram (a) and MALDI-TOF mass spectrum (b) of internally PyBtl-labeled **M12\_AT(Btl)** (calcd. for  $[M+H]^+$ :  $m/z = 4569.03$ ).

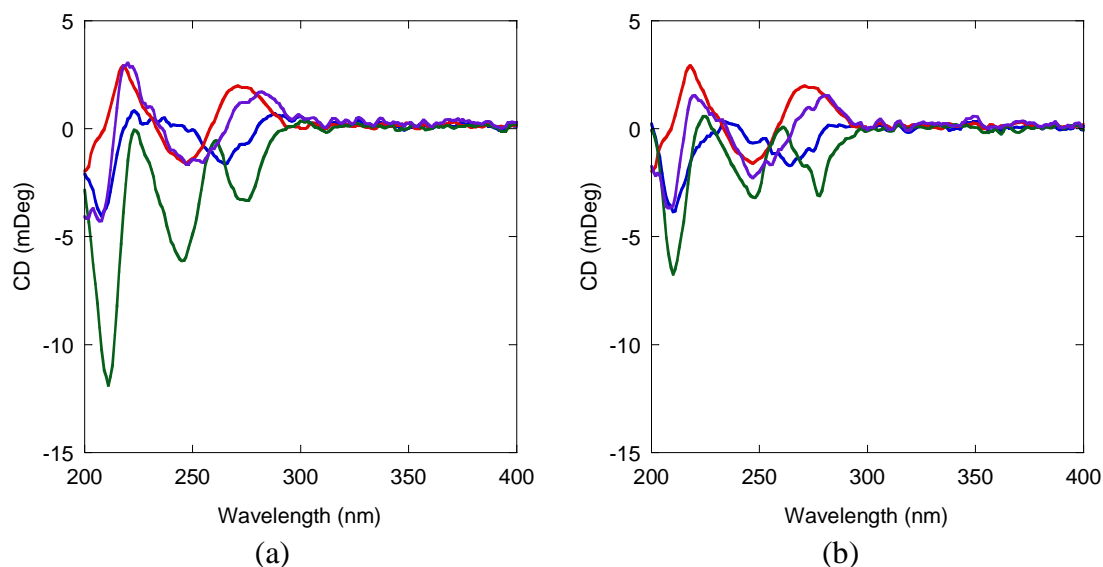

**Fig. S21.** CD spectra of unlabeled acpcPNA **M12** (a) and internally PyBtl-labeled acpcPNA **M12\_AT(Btl)** (b) and their hybrids with complementary DNA (3'-TCAATAGGG ACG-5'): single stranded PNA (blue); single stranded DNA (red); mixture of acpcPNA:DNA (green); sum CD spectra of acpcPNA and DNA (purple). The CD spectra were measured in 10 mM sodium phosphate buffer, pH 7.0, [PNA] = 2.5  $\mu$ M, [DNA] = 3.0  $\mu$ M.

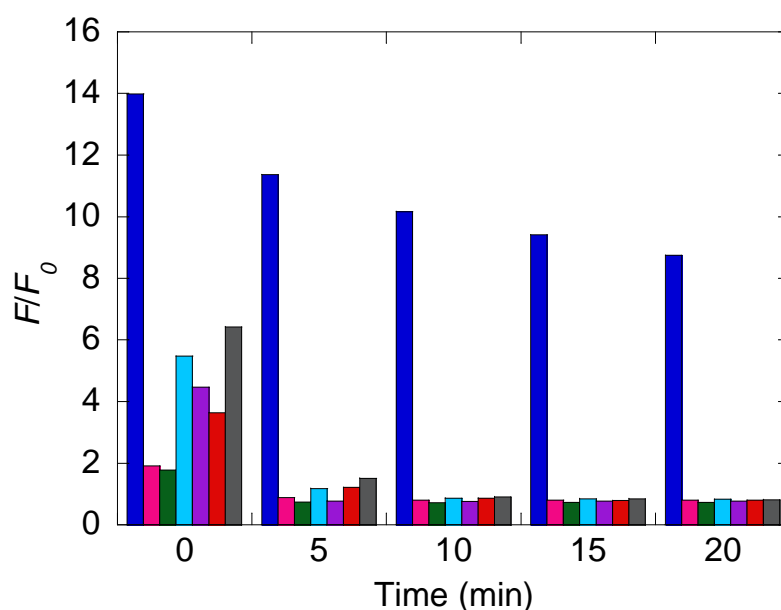

**Fig. S22.** Kinetics of nuclease S1 digestion of hybrids between internally PyBtr-labeled acpcPNA **M11\_TT** with complementary and single base mismatched DNA; [PNA] = 1.0  $\mu$ M, [DNA] = 1.0  $\mu$ M in 30 mM sodium acetate buffer pH 4.6, 1 mM zinc acetate, 5% glycerol. Excitation wavelength was 345 nm. DNA sequence (3'→5'): GATTTAAGTCT ■; GATTTAATGTCT ■; GATTTAATTCT ■; GATTTTAGTCT ■; GATTAAAGTCT ■; GATTCAAGTCT ■; GATTGAAGTCT ■.
